# Supplementary material for: Fish-hunting cone snail venoms are a rich source of minimized ligands of the vertebrate insulin receptor
Source: eLife. 2019 Feb 12;8:e41574. doi: 10.7554/eLife.41574 (PMC6372279; doi:10.7554/eLife.41574)
Supplement: Figure 2—source data 1. [file elife-41574-fig2-data1.xlsx]

## Sheet: Sheet1
Baseline	STZ	Con-Ins G1	Con-Ins G3	Con-Ins T1A	Con-Ins T2	Con-Ins K1	Con-Ins K2	human INS*
93	385	185	180	59	280	127	265	46
94	417	104	117	142	265	105	260	64
50	427	76	290	77	81	215	121	91
70	415	221	126	69	128	205	137	81
65	384	139	234	42	242	40	171	101
54	354		170			305	227	169
50	371
62
55
57
75
Unit: mg/dL blood glucose
*Values replotted from Safavi-Hemami et al. 2015, Specialized insulin is used for chemical warfare by fish-hunting cone snails, Proc Natl Acad Sci USA, 112:6, pages 1743-8
