# Supplementary material for: Fish-hunting cone snail venoms are a rich source of minimized ligands of the vertebrate insulin receptor
Source: eLife. 2019 Feb 12;8:e41574. doi: 10.7554/eLife.41574 (PMC6372279; doi:10.7554/eLife.41574)
Supplement: Figure 5—source data 1. [file elife-41574-fig5-data1.xlsx]

## Sheet: Values Figure 2 Zebrafish STZ
Baseline	STZ	Con-Ins G1	Con-Ins G3	Con-Ins T1A	Con-Ins T2	Con-Ins K1	Con-Ins K2	human INS*
93	385	185	180	59	280	127	265	46
94	417	104	117	142	265	105	260	64
50	427	76	290	77	81	215	121	91
70	415	221	126	69	128	205	137	81
65	384	139	234	42	242	40	171	101
54	354		170			305	227	169
50	371
62
55
57
75
Unit: mg/dL blood glucose
*Values replotted from Safavi-Hemami et al. 2015, Specialized insulin is used for chemical warfare by fish-hunting cone snails, Proc Natl Acad Sci USA, 112:6, pages 1743-8

## Sheet: Values Figure 3 IR-B Binding
	human insulin			Con-Ins G3			Con-Ins T2			Con-Ins T1A			Con-Ins K2			Con-Ins K1			Con-Ins T1B			Con-Ins G1			human DOI
Log (nM) ligand	Mean	SD	N	Mean	SD	N	Mean	SD	N	Mean	SD	N	Mean	SD	N	Mean	SD	N	Mean	SD	N	Mean	SD	N	Mean	SD	N
-2	98.4809	3.31342	6
-1.52288	94.587	4.17865	6	99.1961	1.90883	6	105.488	2.76345	6	98.7972	1.68068	6	99.3789	4.02406	6	96.4392	3.28642	6	98.7522	5.76457	6
-1	79.5031	3.43193	6	95.574	5.38924	6	105.444	3.05274	6	95.3253	1.66113	6	100.367	3.77773	6	97.5291	2.89007	6	96.0958	6.58885	6	92.6608	2.87731	9	97.0792	13.6868	6
-0.522879	60.1207	2.26944	6	93.7768	6.97939	6	97.657	1.81638	6	89.3289	3.125	6	100.577	3.18316	6	99.3203	3.66803	6	91.2194	14.9696	6	83.4936	5.18466	9	108.685	23.2958	6
0	36.4112	1.30612	6	88.6405	5.75142	6	91.6653	3.30321	6	80.0096	2.82794	6	97.5217	3.19807	6	94.1173	7.35395	6	94.4143	3.02941	6	75.8227	6.0374	8	94.2985	16.4433	6
0.477121	21.7463	1.03529	6	89.6351	7.919	6	82.4138	0.226086	6	72.2293	5.02496	6	99.4814	4.22237	6	98.526	6.88985	6	89.2214	4.80738	6	65.8392	1.68956	9	96.8727	18.5539	6
1	12.2278	0.844447	6	81.6932	2.9515	6	78.2564	1.96353	6	57.2544	3.30061	6	95.4547	7.86665	6	89.5397	5.2025	6	72.7394	4.19848	6	57.4528	5.0656	9	87.2166	24.9478	6
1.47712	7.67414	0.207134	6	71.4821	2.05412	6	67.8466	7.37904	6	43.3228	1.98458	6	95.8431	6.74288	6	84.6715	3.10082	6	59.6115	5.99658	6	46.5237	3.29591	9	66.8525	21.3555	6
2	5.27248	0.357767	6	55.9199	4.41055	6	54.9464	3.34501	6	30.483	1.29574	6	83.2482	2.83218	6	72.7393	3.19324	6	51.8226	3.17147	6	35.7955	1.55224	9	54.953	23.6131	6
2.47712	4.94056	0.122501	6	42.3631	2.59052	6	40.3236	3.46752	6	22.7392	1.25145	6	76.2585	5.98296	6	58.9047	2.14662	6	43.4864	3.8674	6	28.5182	2.06303	9	40.3815	18.9592	6
3				36.9935	2.56994	6	28.1131	3.71155	6	15.8984	0.504615	6	59.8973	1.66962	6	46.2414	1.17681	6	33.7687	6.79436	6	19.6115	1.56284	9	28.3472	9.94726	6
3.47712																									16.6058	2.09654	6
Units: y-axis: %B / B0; x-axis: Log (nM) ligand

## Sheet: Values Figure 4 IR-B Activation
	Conus geographus				Conus tulipa					Conus kinoshitai
	Con-Ins G1		Con-Ins G3		Con-Ins T1A		Con-Ins T1B		Con-Ins T2		Con-Ins K1		Con-Ins K2
relative Akt levels	Mean	SD	Mean	SD	Mean	SD	Mean	SD
2.9345	0.881295	0.0427816	0.89395	0.0164945	0.969506	0.0448395	0.91419	0.0445793	0.92494	0.0468421	1	0.143661	0.85119	0.119521
2.33244	0.74309	0.0578978	0.549805	0.0260742	0.903213	0.0154428	0.852709	0.0474021	0.821803	0.0302547	0.87627	0.0831674	0.647853	0.0465768
1.73038	0.584349	0.0312562	0.33503	0.00906627	0.765411	0.0358913	0.747334	0.016385	0.699057	0.0379333	0.627254	0.0772021	0.0967069	0.0374903
1.12832	0.453581	0.0172714	0.292651	0.0090072	0.546207	0.0337096	0.515978	0.027728	0.474979	0.0610809	0.49158	0.0672046	0.0802089	0.00453345
0.526258	0.353581	0.0316219	0.13164	0.00890564	0.311707	0.0122245	0.28575	0.00742721	0.25636	0.0131291	0.320522	0.0169175	0.188719	0.0220297
-0.0758015	0.154901	0.0870689	0.123759	0.00446816	0.157639	0.00939222	0.154355	0.00683788	0.149178	0.00919368	0.217478	0.0182925	0.127762	0.0354841
-0.677861	0.130829	0.0400866	0.102098	0.00871819	0.108679	0.00179806	0.100379	0.00404652	0.0999682	0.00446479	0.187443	0.0211778	0.164595	0.0129607
-1.27992	0.129865	0.00692418	0.0994471	0.00821253	0.0895257	0.00393865	0.0853507	0.00395243	0.096687	0.0119053	0.154546	0.0129381	0.184467	0.0133523
-1.88198	0.125879	0.00770982	0.13863	0.012273	0.0891632	0.00256978	0.0811947	0.00476359	0.0794754	0.00714122	0.193765	0.0184201	0.182785	0.0223301
-2.48404	0.120829	0.00317755	0.188519	0.185119	0.0913328	0.00794508	0.0872526	0.00579785	0.0813442	0.00509467	0.15492	0.0151536	0.181589	0.0286445
Units: y-axis: relative AkT levels; x-axis: Log (nM) ligand

## Sheet: Values Figure 5 Mouse STZ
Time (min)	Human insulin (1 IU/kg)					Con-Ins G1 (10x)			Con-Ins T1A (10x)			Con-Ins T1A (1x)			Con-Ins K1 (10x)			Con-Ins K1 (20x)
0	335	355	362	356	365	359	370	343	425	459	594	558	583	483	365	396	451	403	306	418
15	260	266	316	341	323	352	309	394	330	532	462	485	522	497	459	228	374	401	300	399
30	146	129	117	196	248	136	173	152	205	245	120	559	456	338	251	168	298	203	192	189
45	87	83	105	150	160	105	110	123	93	152	65	442	309	230	211	127	240	158	126	126
60	68	60	89	90	107	76	77	77	59	71	50	349	147	108	199	149	225	107	79	124
75	53	39	67	76	100	59	61	42	49	59	46	201	126	86	165	185	174	100	55	107
90	33	29	70	63	91	48	36	38				150	117	64	198	235	198	102	60	101
105	38	28	65	63	99	41	31	31	32	34	66	105	116	62	247	250	287	117	60	118
120	40	31	81	58	112	37	29	32	145	82	90	123	173	197	298	215	322	126	55	147
Unit: mg/dL blood glucose
